# Supplementary material for: Peripheral Ion Channel Gene Screening in Painful- and Painless-Diabetic Neuropathy
Source: MDPI journal article supplement (doi:10.3390/ijms23137190), 2022-06-28
Supplement: s1 [file s1]

## Supplementary materials

**Table S1. Peripheral ion channels panel**

| <b>Gene</b> | <b>OMIM number</b> | <b>Full gene name</b>                                                                     |
|-------------|--------------------|-------------------------------------------------------------------------------------------|
| ANO1        | 610108             | Anoctamin 1, calcium activated chloride channel                                           |
| ANO3        | 610110             | Anoctamin 3                                                                               |
| HCN1        | 602780             | Hyperpolarization activated cyclic nucleotide-gated potassium channel 1                   |
| KCNA2       | 176262             | Potassium voltage-gated channel, shaker-related subfamily, member 2                       |
| KCNA4       | 176266             | Potassium voltage-gated channel, shaker-related subfamily, member 4                       |
| KCNK18      | 613655             | Potassium channel, subfamily K, member 18                                                 |
| KCNN1       | 602982             | Potassium intermediate/small conductance calcium-activated channel, subfamily N, member 1 |
| KCNQ3       | 602232             | Potassium voltage-gated channel, KQT-like subfamily, member 3                             |
| KCNQ5       | 607357             | Potassium voltage-gated channel, KQT-like subfamily, member 5                             |
| KCNS1       | 602905             | Potassium voltage-gated channel, delayed-rectifier, subfamily S, member 1                 |
| TRPA1       | 604775             | Transient receptor potential cation channel, subfamily A, member 1                        |
| TRPM8       | 606678             | Transient receptor potential cation channel, subfamily M, member 8                        |
| TRPV1       | 602076             | Transient receptor potential cation channel, subfamily V, member 1                        |
| TRPV3       | 607066             | Transient receptor potential cation channel, subfamily V, member 3                        |
| TRPV4       | 605427             | Transient receptor potential cation channel, subfamily V, member 4                        |

**Table S2. Characteristics of patients with painful- and painless- Diabetic Neuropathy**

|                                                  | <b>Painful-DN</b> | <b>Painless-DN</b> | <b>Total</b>    | <b>p</b>  |
|--------------------------------------------------|-------------------|--------------------|-----------------|-----------|
| Mean age at recruitment<br>[years +/- SD]        | 64.2 (+/- 10.3)   | 64.8 (+/- 11.9)    | 64.5 (+/- 11.2) | 0.56*     |
| Females (n, %)                                   | 82 (36.9)         | 72 (23.7)          | 154 (29.3)      | < 0.0001& |
| Males (n, %)                                     | 140 (63.1)        | 232 (76.3)         | 372 (70.7)      |           |
| DM1 (n, %)                                       | 34 (30.4)         | 78 (69.4)          | 112 (21.3)      | 0.0032&   |
| DM2 (n, %)                                       | 190 (45.9)        | 224 (54.1)         | 414 (78.7)      |           |
| Mean age of onset DM1<br>[years +/- SD]          | 25.9 (+/- 15.2)   | 27.8 (+/- 16.1)    | 27.2 (+/- 11.2) | 0.56*     |
| Mean age of onset DM2<br>[years +/- SD]          | 52.1 (+/- 12.1)   | 55.1 (+/- 10.9)    | 53.7 (+/- 11.6) | 0.007*    |
| Mean age of onset neuropathy<br>[years +/- SD]   | 59.1 (+/-11.1)    | 62.3 (+/-11.7)     | 60.8 (+/-11.5)  | 0.012*    |
| Duration of neuropathy<br>[years +/- SD]         | 6.9 ( +/- 5.9)    | 5.5 (+/-6.5)       | 6.2 (+/- 6.2)   | 0.25*     |
| Positive family history for<br>neuropathy (n, %) | 30 (18.6)         | 159 (56.8)         | 189 (42.9)      | < 0.0001& |
| Negative family history for<br>neuropathy (n, %) | 131 (81.4)        | 121 (43.2)         | 252 (57.1)      |           |
| Max pain during night [PI-NRS]                   | 6.2 (+/- 3.0)     | 0.5 (+/- 1.5)      | 3.2 (+/- 3.7)   | < 0.0001* |
| Mean pain during night [PI-NRS]                  | 3.7 (+/- 2.8)     | 0.2 (+/- 0.8)      | 1.8 (+/- 2.7)   | < 0.0001* |
| Max pain during day [PI-NRS]                     | 5.8 (+/- 3.0)     | 0.6 (+/-1.6)       | 3.1 (+/- 3.5)   | < 0.0001* |
| Mean pain during day [PI-NRS]                    | 3.4 (+/-2.6)      | 0.2 (+/- 0.8)      | 1.7 (+/- 2.5)   | < 0.0001* |
| Normal TTT (n, %)                                | 32 (20.1)         | 44 (24.3)          | 76 (22.4)       | 0.36&     |
| Abnormal TTT (n, %)                              | 127 (79.9)        | 137 (75.7)         | 264 (77.6)      |           |

\*Independent Student's t-test, &amp;chi-square test, significance level &lt;0.05

**Table S3. Average coverage of MIP-NGS of 15 ICG**

| <b>Gene name</b> | <b>Number of MIP [n]</b> | <b>Targeted coding region [bp]</b> | <b>Total number of nucleotides not covered by MIP &lt;20x/bp [bp]</b> | <b>Location of missing area</b> | <b>Average coverage &gt;30x/bp [%]</b> |
|------------------|--------------------------|------------------------------------|-----------------------------------------------------------------------|---------------------------------|----------------------------------------|
| ANO1             | 32                       | 2961                               | 441                                                                   | ex1*, ex2, ex12*, ex20*, ex26   | 85.1                                   |
| ANO3             | 30                       | 2946                               | 0                                                                     | -                               | 100                                    |
| HCN1             | 18                       | 2673                               | 425                                                                   | ex1*                            | 84.1                                   |
| KCNA2            | 10                       | 1500                               | 0                                                                     | -                               | 100                                    |
| KCNA4            | 10                       | 1962                               | 0                                                                     | -                               | 100                                    |
| KCNK18           | 7                        | 1155                               | 0                                                                     | -                               | 100                                    |
| KCNN1            | 14                       | 1632                               | 249                                                                   | ex6, ex10, ex11                 | 84.7                                   |
| KCNQ3            | 21                       | 2619                               | 256                                                                   | ex1                             | 90.2                                   |
| KCNQ5            | 23                       | 2856                               | 192                                                                   | ex1                             | 93.3                                   |
| KCNS1            | 9                        | 1581                               | 181                                                                   | ex4                             | 88.6                                   |
| TRPA1            | 31                       | 3360                               | 111                                                                   | ex1                             | 96.7                                   |
| TRPM8            | 32                       | 3315                               | 0                                                                     | -                               | 100                                    |
| TRPV1            | 20                       | 2520                               | 153                                                                   | ex3*                            | 93.9                                   |
| TRPV3            | 19                       | 2376                               | 348                                                                   | ex2, ex3, ex7                   | 85.4                                   |
| TRPV4            | 19                       | 2616                               | 214                                                                   | ex3, ex9                        | 91.8                                   |

bp, base pair, ex, exon, n, number

\* large part of exon <20x coverage/bp or sequence data is missing completely

**Table S4. Mean pain score in patients with painful- Diabetic Neuropathic with and without an ion channel variant**

|                                               | Max pain during night | Mean pain during night | Max pain during day | Mean pain during day |
|-----------------------------------------------|-----------------------|------------------------|---------------------|----------------------|
| patients with ICG variant (n=9) [+/- SD]      | 7.00 [+/- 2.96]       | 4.56 [+/- 3.47]        | 7.33 [+/-1.87]      | 3.89 [+/-2.42]       |
| patients without ICG variant (n=150) [+/- SD] | 6.2 [+/-3.0]          | 3.7 [+/-2.8]           | 5.8 [+/-3.0]        | 3.4 [+/-2.6]         |

Pain intensity was evaluated using numerical rating scale PI-NRS.

**Table S5. Autonomic complaints reported by patients with painful- Diabetic Neuropathy (n=9) carrying variant in ICG.**

| Variant                   | sweating change | diarrhea | constipation | micturition problems | dry eyes | dry mouth | orthostatic dizziness | Palpitations | hot flashes | hypersensitivity of leg's skin | burning feet | sheet intolerance | restless leg |
|---------------------------|-----------------|----------|--------------|----------------------|----------|-----------|-----------------------|--------------|-------------|--------------------------------|--------------|-------------------|--------------|
| ANO3 p.(Ser213Phe)        | 1               | 2        | 0            | 0                    | 1        | 0         | 2                     | 3            | 1           | 3                              | 3            | 0                 | 1            |
| ANO3 p.(Ile453Val)        | 1               | 0        | 0            | 0                    | 3        | 0         | 1                     | 1            | 1           | 3                              | 2            | 3                 | 1            |
| ANO3 p.(Leu984Phe)        | 3               | 1        | 1            | 0                    | 2        | 2         | 1                     | 0            | 0           | 2                              | 1            | 0                 | 0            |
| HCN1 p.(Arg405Gln)        | 2               | 1        | 1            | 0                    | 2        | 2         | 1                     | 2            | 0           | 2                              | 2            | 2                 | 1            |
| KCNK18 p.(Phe139Trpfs*25) | 1               | 1        | 1            | 1                    | 0        | 2         | 2                     | 0            | 0           | 2                              | 1            | 1                 | 0            |
| TRPA1 p.(Leu118Val)       | 1               | 1        | 1            | 0                    | 0        | 1         | 1                     | 0            | 0           | 1                              | 2            | 3                 | 3            |
| TRPA1 p.(Arg652*)         | 0               | 1        | 1            | 2                    | 2        | 2         | 1                     | 1            | 0           | 1                              | 2            | 1                 | 0            |
| TRPA1 p.(Val705Glyfs*79)  | 0               | 1        | 0            | 0                    | 0        | 1         | 1                     | 0            | 0           | 1                              | 1            | 0                 | 0            |
| TRPM8 p.(Thr732Ile)       | 2               | 0        | 2            | 0                    | 2        | 2         | 1                     | 1            | 1           | 1                              | 1            | 0                 | 1            |

Numeric scale (1-4) expresses frequency of complaints; 0, never; 1, sometimes; 2, often; 3, always; -, not determined. Three painful-DN patients not shown in the table, data incomplete

**Table S6.** Autonomic complaints reported by patients with painless- Diabetic Neuropathy (n=4) carrying a variant in ICG.

| Variant                | sweating change | diarrhea | constipation | micturition problems | dry eyes | dry mouth | orthostatic dizziness | Palpitations | hot flashes | hypersensitivity of leg's skin | burning feet | sheet intolerance | restless leg |
|------------------------|-----------------|----------|--------------|----------------------|----------|-----------|-----------------------|--------------|-------------|--------------------------------|--------------|-------------------|--------------|
| TRPA1<br>p.(Leu118Val) | 1               | 0        | 1            | 1                    | 3        | 1         | 0                     | 1            | 0           | 2                              | 0            | 0                 | 0            |
| TRPM8<br>p.(Val986Ile) | 1               | 0        | 1            | 2                    | 1        | 0         | 0                     | 1            | 1           | 1                              | 1            | 0                 | 0            |
| TRPV4<br>p.(Thr597Met) | 0               | 1        | 0            | 0                    | 0        | 0         | 1                     | 1            | 0           | 1                              | 0            | 0                 | 0            |
| TRPV4<br>p.?           | 2               | 0        | 1            | 2                    | 3        | 1         | 1                     | 1            | 0           | 0                              | 1            | 0                 | 0            |

Numeric scale (1-4) expresses frequency of complaints; 0, never; 1, sometimes; 2, often; 3, always; -, not determined. Data presented only for patients with ICG that fully completed the autonomic complaints questionnaire
